# Supplementary material
Source: PubMed Central journal article supplement (PMC3426435)
Supplement: suppinfo.pdf [file suppinfo.pdf]

| # | Accession          | Targeted Region | Target Sequence                                                                                               | Tm_CP | Tm_RP | Gene    | PN(CP;RP)         |
|---|--------------------|-----------------|---------------------------------------------------------------------------------------------------------------|-------|-------|---------|-------------------|
| 1 | NM_001161<br>857.1 | 1282-1382       | AGGTCACGTCTGAGACGGACACCAGGTATTTTGATGAGGAGTTC<br>ACAGCCCAGATGATCACCATTACGCCACCTGACCAAGACGACGG<br>CATGGAGGGGGA  | 86    | 86    | AKT1    | 353407;253<br>407 |
| 2 | AY881028.<br>1     | 110-210         | CCATAACCAGTCAGAGGCAGTACACTCTAAGAATTGAGTTATTG<br>GACTGGGAAGGAAACCGAGCCTATTCACAATACGACAGATTCCA<br>CATAGGAAATGA  | 82    | 83    | ANGPT1  | 353424;253<br>424 |
| 3 | AY881029.<br>1     | 149-249         | AACACTCCCTTTCTACAAACAAATTGGAAAAACAGATTTTGGATC<br>AGACCAGTGAAATAAGCAAAGTCAAGATAAGAACAGCTTCCTG<br>GAAAAGAAAGT   | 78    | 84    | ANGPT2  | 353410;253<br>410 |
| 4 | EE789237.<br>1     | 391-491         | GTGAAGAACATGTCACCTTGAAGTCTGACTCAAACTCGAAAGTCTC<br>CTTGAAGAGAAAATTCTACTGCAACAGAAAGTGAGATACCTGGA<br>GGACCAATTAA | 80    | 84    | ANGPTL3 | 353411;253<br>411 |
| 5 | EE823222.<br>1     | 463-563         | AGGGAAAGTGGATTGTTCCAGATCCAGCCCCAGGGATCCCCGC<br>CTTTCCTGGTTAACTGCAAGATGACCTCAGATGGAGGCTGGACT<br>GTAATTCAAAGGC  | 85    | 85    | ANGPTL4 | 353404;253<br>404 |
| 6 | EE861424.<br>1     | 290-390         | TGATGGACCAATACAGCGAGATTAACGCCATCAGCACTGCCTGC<br>TCCAATGGGTTGTCTAAGTGTGAGGAGCTGGCCAAAACACTTTT<br>CAGCCAGTGGAT  | 86    | 85    | ANPEP   | 353435;253<br>435 |

|    |                    |          |                                                                                                              |    |    |         |                   |
|----|--------------------|----------|--------------------------------------------------------------------------------------------------------------|----|----|---------|-------------------|
| 7  | EE828676.<br>1     | 481-581  | AGGACAGCAACTTCACCCTCATTGATAATCACGATAACACGGCC<br>AACATCATAGTCAAGTACGGGTATTTTGACCGGGAGCGCGCCAA<br>GTCCACCACCT  | 84 | 85 | CDH5    | 353412;253<br>412 |
| 8  | EE764535.<br>1     | 267-367  | AGGGACCGCCTGGCACGCCCGGAGTCAAGGGGGATCCTGGAG<br>CTGTGGGGCCACCAGGGAGCAAGGGAGAAGTTGGAGCAGACG<br>GAGCACCTGGCTTCCC | 92 | 92 | COL18A1 | 353383;253<br>383 |
| 9  | L47282.1           | 231-331  | ATTACTGGCAAGGCCCTCGAGCCTTACATTAGCAGGTGCACCGT<br>CTGTGAGGGTCCTGCGATTGCCATTGCCATCCACAGTCAAAGCA<br>CTGATGTTCCCC | 85 | 86 | COL4A3  | 353406;253<br>406 |
| 10 | NM_001164<br>714.1 | 900-1000 | CTTCCTGTGGAGTTCAAGTGTCTGATGGGGAAGTCATGAAGAA<br>GAGCATGATGTTTCATCAAGACCTGTGCCTGCCATTACAAGTCC<br>CCGGAGACAATG  | 84 | 86 | CTGF    | 353461;253<br>461 |
| 11 | NM_001009<br>358.1 | 116-216  | GCGCCCGTGGTCAACGAAGTGCCTGCCAGTGCCTGCAGACCG<br>TGCAGGGGATTACCTCAAGAACATGCAGAGCGTGAAGGTGAC<br>GCCCCCGGGCCCCC   | 86 | 86 | CXCL1   | 353375;253<br>375 |
| 12 | NM_001009<br>191.1 | 135-235  | CACGCTGCACCTGCATCGAGATCAGTAATGGATCTGTTAATCCA<br>AGGTCCTTAGAAAACTTGAAGTATTCTGCAAGTCAATCCTGC<br>CCACGTGTCSA    | 83 | 80 | CXCL10  | 353445;253<br>445 |

|    |                |         |                                                                                                              |    |    |       |                   |
|----|----------------|---------|--------------------------------------------------------------------------------------------------------------|----|----|-------|-------------------|
| 13 | EE791361.<br>1 | 295-395 | TAAGAATGGTCAGGAAGCTTGTCTCAACCCTGAAGCTCCCATGG<br>TTAAGAAAATCATCAATAAGATGCTAAACAAGGGCAGCACCAACT<br>GACCTAGAGGG | 85 | 85 | CXCL2 | 353432;253<br>432 |
| 14 | DY496905.<br>1 | 105-205 | CCTGTCGCGGCCGTTGTGAGAGAGCTGCGTTGTGTGTGTTTAA<br>CCACCACCCCGGGAATTCATCCCAAATGGTCAGTGATCTGCAG<br>GTGACCGCCGCGG  | 83 | 85 | CXCL5 | 353428;253<br>428 |
| 15 | GT875699.<br>1 | 55-155  | CCAGCCAAGGGATGATCCACCCAAAATCCATAAAGGACCTTAAA<br>CAATTTGCTCCAAGCCCTACTTGTGAGAAAATTGAAATCATCGCT<br>ACAGTGAAGAA | 82 | 82 | CXCL9 | 353440;253<br>440 |
| 16 | GT642504.<br>1 | 319-419 | TTCACAGTTTTACCCTGAGCAAGGATTTCAAAGAGGGACACAA<br>CTACTACTACATCTCCAAGCCCATCCACAACCAGGAAGACCGTT<br>GCTTGAGGCTGA  | 81 | 85 | EFNA1 | 353416;253<br>416 |
| 17 | GO771352.<br>1 | 374-474 | TGGTTTGGATTGAATCCAAGTTTACAAGCAGACACCACTGCGGG<br>GGGCCGCCGACAGTGGACAAGGGTGACGAGGGGTGGGCATTG<br>GGGTGCCAGGCAGG | 86 | 89 | EFNA3 | 353387;253<br>387 |
| 18 | EE798517.<br>1 | 65-165  | TCAGCCCCAGTTAGTCAAACCCAGCGACCTTTGCCCTGGTTG<br>CCAAGGGCTTTGCAGTGTGAAGCAGGGAAATAAGGATCTGTCTG<br>TTTAGTGATAC    | 86 | 81 | EFNA5 | 353434;253<br>434 |

|    |                    |           |                                                                                                              |    |    |       |                   |
|----|--------------------|-----------|--------------------------------------------------------------------------------------------------------------|----|----|-------|-------------------|
| 19 | CF116254.<br>1     | 289-389   | AGAGCCCGGCGAACATTTACTACAAGGTCTGAGCCTCGGCGGT<br>GCCTTCGCTTCCCGGAGGAACTTACTGTCCCCGCTGCCGCC<br>GCCGA            | 85 | 84 | EFNB2 | 353374;253<br>374 |
| 20 | DY492950.<br>1     | 329-429   | TGTGCAGCCTCGGCCCCACAAGTCTTGCAGAAACAGTCTACTGT<br>GACCTACAGCCTGTGGACTCCAAGGTGACATACACAATGAGCCA<br>GGTTTCTGAGGG | 85 | 85 | ENG   | 353400;253<br>400 |
| 21 | EU340261.<br>1     | 197-297   | GACGACAGAATCACAGAACTGGTTGGTTACCACCCTGAAGAGCT<br>GCTTGGCCGCTCAGCCTATGAGTTCTACCATGCGCTGGACTCAG<br>AGAACATGACCA | 85 | 86 | EPAS1 | 353414;253<br>414 |
| 22 | DY521965.<br>1     | 311-411   | CCCCTTCTGGATCAGCGGCAGCCTCACTACTCAGCTTTTGGCTC<br>CGTGGGGGAGTGGCTTCGAGCCATCAAATGGGAAGATACGAA<br>GAAAGCTTTGCAG  | 85 | 85 | EPHB4 | 353402;253<br>402 |
| 23 | NM_001166<br>195.1 | 1730-1830 | CCCCTCTAACAACCGCTGGTATCAAATGGGCATCGTCTCATGGG<br>GTGAAGGCTGTGACAGGGATGGAAAATATGGCTTCTACACACAC<br>GTCTCCGCCTG  | 85 | 85 | F2    | 353464;253<br>464 |
| 24 | DQ152951.<br>1     | 35-135    | AAGGCTGGAGGAAAACCATTATAACACCTACACATCCAAGAAGC<br>ATGCAGAGAAGAATTGGTTCATTGGTCTCAAGAAGAACGGAAGC<br>TCCAACTCGGT  | 84 | 82 | FGF1  | 353426;253<br>426 |

|    |                    |         |                                                                                                              |    |    |       |                   |
|----|--------------------|---------|--------------------------------------------------------------------------------------------------------------|----|----|-------|-------------------|
| 25 | NM_001009<br>769.1 | 355-455 | AATACTCCAGTTGGTATGTGGCACTGAAACGAACTGGGCAGTAT<br>AAACTTGGACCCAAAACAGGACCTGGGCAGAAAGCTATACTTTT<br>TCTTCCAATGTC | 83 | 83 | FGF2  | 353452;253<br>452 |
| 26 | AY737276.<br>1     | 845-945 | CCGCGGTGCACAAGGTCTCCCGCTTCCCGCTCAAGCGACAGGT<br>GTCCTTGGAGTCCAGTTCATCCATGAGCTCCAACACGCCACTGG<br>TACGCATCGCCCG | 86 | 85 | FGFR3 | 353423;253<br>423 |
| 27 | GW997725.<br>1     | 565-665 | ACCTGAATTAGTGCCTGTAAAGTTGCCAACCATACAGGTTGTAA<br>GTGCTTCCCAACGGCTCCCCGCCACCCATTCTCAATCATTAGAA<br>GATCCATCCAG  | 80 | 84 | FIGF  | 353444;253<br>444 |
| 28 | AF233077.1         | 130-230 | TAAGAACCCTGACTATGTGAGAAAAGGAGATACGCGACTTCCTC<br>TGAAGTGGATGGCTCCCGAGTCCATCTTTGACAAGATCTATAGC<br>ACCAAGAGCGAC | 86 | 85 | FLT1  | 353418;253<br>418 |
| 29 | EE796001.<br>1     | 107-207 | CTCTTCTTTACATCTGTCTTCTTGATCTCTGCCTTGAAGGCCTC<br>CGCCTCGCCGTTCTGGTCGTCTTGCCAGCAGGTCCATGAGG<br>TAGGCGATGTAG    | 78 | 86 | HAND2 | 353377;253<br>377 |
| 30 | AF213397.1         | 146-246 | ACAGCTTTTTGCCTTCGAGCTATCGGGGTAAAGACCTACAGGAA<br>AACTACTGTCGAAATCCTCGAGGGGAAGAAGGGGGACCTTGGT<br>GTTTCACAAGCAA | 83 | 85 | HGF   | 353399;253<br>399 |

|    |                    |         |                                                                                                              |    |    |       |                   |
|----|--------------------|---------|--------------------------------------------------------------------------------------------------------------|----|----|-------|-------------------|
| 31 | AY485676.<br>1     | 86-186  | CTGTTATGAGGCTCACCATCAGCTATTTGCGTGTGAGGAACTT<br>CTGGATGCTGGTGATTTGGATATTGAAGATGAAATGAAGGCACA<br>GATGAACTGCTT  | 81 | 82 | HIF1A | 353409;253<br>409 |
| 32 | GT873986.<br>1     | 180-280 | GGCAAGTGTGTTTGGAGCCGAACTACCACCTAGTGGATGGA<br>AATTTTGAACCTTTGCCTGATTATTGGCTCTCTCTTCTGTTCAAG<br>AACTGGTGGG     | 81 | 79 | HPSE  | 353439;253<br>439 |
| 33 | EE798621.<br>1     | 111-211 | CAAAGCAATTAATTTCTCAGAAATCTGAGAAGCACCAAACGTGA<br>CCATTTTTTAAATGTCCGCTTTTCAAAAAATAGAAACACACGAGG<br>GGGGACTCCC  | 77 | 79 | ID1   | 353403;253<br>403 |
| 34 | NM_001177<br>678.1 | 135-235 | ACGTGCGCGCGTTGCAGGCTGCTCCAGAGGGTCTCTGGCTTTC<br>TCCTTCCTTCCAGCACTTCCCAACCTCATTGCTCAGTATGAAGGC<br>GCTCAGCCCGGT | 85 | 85 | ID3   | 353465;253<br>465 |
| 35 | NM_001009<br>803.1 | 470-570 | TGATGAATGACCTGTGCGCCAAAATCTAACCTCAGAAAGCGGAAG<br>AGAAGTCAGAATCTTTTCGAGGCCGGAGAGCATCAATGTAATG<br>GTTCTCCTGCCT | 85 | 82 | IFNG  | 353454;253<br>454 |
| 36 | NM_001009<br>774.2 | 244-344 | GCGGGACCTGAGACCCTCTGCGGGGCTGAGTTGGTGGATGCTC<br>TCCAGTTCGTGTGCGGAGACAGGGGCTTTTATTTCAACAAGCCC<br>ACGGGTACGGCT  | 85 | 85 | IGF1  | 353398;253<br>398 |

|    |                    |           |                                                                                                              |    |    |       |                   |
|----|--------------------|-----------|--------------------------------------------------------------------------------------------------------------|----|----|-------|-------------------|
| 37 | X56972.1           | 685-785   | TGTACCCTAACTGGTACATCAGCACTTCTCAAATCGAAGAAAAGC<br>CCGTCTTCCTGGGACGTTTTAGAGGTGGCCAGGATATAACTGAC<br>TTCAGAATGGA | 83 | 83 | IL1B  | 353467;253<br>467 |
| 38 | NM_001009<br>392.1 | 630-730   | GAATTTCTGCAGTTCAGCCTGAGAGCTATTCGGATGAAGTAGC<br>TGCGGCTCCCATGATTGTGGTAGTTCCTGGGCATTCCCTCCTCT<br>GGTCAGAAACCT  | 84 | 84 | IL6   | 353448;253<br>448 |
| 39 | NM_001009<br>401.1 | 50-150    | AGAAGAAACCTGACAAAAAGCCTCTTGTTCAAGTATGACTTCCAA<br>GCTGGCTGTTGCTCTCTTGCCGCTTTCCTGCTCTCTGCAGCTC<br>TGTGTGAAGCT  | 83 | 84 | IL8   | 353450;253<br>450 |
| 40 | GT875990.<br>1     | 606-706   | GTTACTGCCAAGGGGGCTTCAGTGCCGAGTTCACCAAGACTGG<br>GCGTGTGGTCCTGGGTGGACCAGGGAGCTATTTCTGGCAAGGC<br>CAGATCCTGTCCGC | 85 | 86 | ITGA5 | 353396;253<br>396 |
| 41 | NM_001113<br>771.1 | 2025-2125 | TCCATCCCCTGCAGGCTGATTTTCATCGGTGTTGTCCGTAACAG<br>TGAAGCCTTAGCAAGACTTTCCTGCGCGTTTAAGACAGAAAACC<br>AAACCCGCCAGG | 82 | 83 | ITGAV | 353457;253<br>457 |
| 42 | AF349462.1         | 144-244   | CAGGCTGAGGCTGAGCCTTACAGCCACCCGCTGCAACAATGGC<br>AATGGGACCTTTGAGTGTGGGGTGTGCCGCTGTGGGCCTGGCT<br>GGCTGGGGTCCAG  | 89 | 89 | ITGB3 | 353385;253<br>385 |

|    |                    |           |                                                                                                              |    |    |        |                   |
|----|--------------------|-----------|--------------------------------------------------------------------------------------------------------------|----|----|--------|-------------------|
| 43 | DQ152971.<br>1     | 40-140    | ATATTCGCTTTACGTAGCTTGCGAGCCTTCCCCTTCTGCAAACAA<br>TGAAATGCATGTGGCCATTTCTGCTGAAGACATCCGGGATGATG<br>GAAACCCTATC | 77 | 86 | JAG1   | 353427;253<br>427 |
| 44 | AF233076.1         | 305-405   | GAGGAATTTTGTAGGCGACTGAAAGAAGGAACTAGAATGAGAGC<br>CCCTGATTACACCACACCAGAAATGTACCAGACCATGCTTGATT<br>GCTGGCATGGGG | 85 | 85 | KDR    | 353417;253<br>417 |
| 45 | DY493581.<br>1     | 609-709   | CAGGACCGCGGGGTACACAACGCCAGCCTGGCTCTGTCAGCCA<br>GTATCAGCCGTGTGCGGGAAATCATTGCCAGGCCCGTGGTGC<br>AACCAGCAAAGTCA  | 85 | 85 | LAMA5  | 353390;253<br>390 |
| 46 | U84247.1           | 5-105     | CATCCGCAAGGTCCAGGATGACACCAAACCCTCATCAAGACGA<br>TTGTCACCAGGATCAATGACATCTCACACACGCAGTCCGTCTCC<br>TCCAACAGAGG   | 85 | 85 | LEP    | 353466;253<br>466 |
| 47 | NM_001142<br>894.1 | 1005-1105 | ACGAATGGAAAAGTCTGACCTATGATGAAGTCATCAGCTTTGTG<br>CCGCCACCCCTTGACCAAGAAGAGATGGAGTCTTGAGTGTCTG<br>GTTTCTATTCTGT | 83 | 79 | MAPK14 | 353459;253<br>459 |
| 48 | GT881645.<br>1     | 465-565   | CACGCCCTCCCTCCACAGGCTCAAGATGTTACCCACCAGTGCCT<br>TCTTCTCCTCGTTAGCTTTATCAATCATGCCCTGCTTCTTCCCT<br>CTCACTTGCCC  | 85 | 78 | MDK    | 353443;253<br>443 |

|    |                    |           |                                                                                                              |    |    |        |                   |
|----|--------------------|-----------|--------------------------------------------------------------------------------------------------------------|----|----|--------|-------------------|
| 49 | DY516990.<br>1     | 290-390   | GAGGACCCCTTCAACCAGAAGACCCTTAAATACCTGCTGCTGGG<br>CCGCTGGAGAAAGAAGCATCTGACCTTCCGCATCTTGAACCTAC<br>CATCCACCCTAC | 86 | 85 | MMP19  | 353401;253<br>401 |
| 50 | NM_001166<br>180.1 | 650-750   | AGAAGGACAAGTGGTCCGTGTCAAGTACGGGAATGCTGACGGG<br>GAATATTGCAAGTTCCCCTTCCGGTTCAACGGCAAGGAGTACAC<br>CAGCTGCACAGAC | 85 | 86 | MMP2   | 353462;253<br>462 |
| 51 | FJ185130.1         | 35-135    | GGCATTCAAGGAGATGCCCACTTCGACGATGAAGAGTTATGGTC<br>TCTGGGCAAAGGCGTTGTGATCCCGACCTACTTCGGAAACGCG<br>AAGGGCGCCGCCT | 85 | 86 | MMP9   | 353437;253<br>437 |
| 52 | DY496911.<br>1     | 546-646   | GCTCCTGCATGCCCGGATGGACAGGTGAGCAGTGCCAGCTTCG<br>AGACTTCTGCTCAGCCAACCCCTGCGTCAATGGAGGGGTGTGT<br>CTGGGCACCTACCC | 89 | 88 | NOTCH4 | 353386;253<br>386 |
| 53 | EE867112.<br>1     | 10-110    | GCTGTCATAGACAATTTTACGTATAACAAGGTGGAGACCATCGG<br>TGACGCCTACATGGTGGTGTCCGGGCTCCCGGTGCGGAACGGG<br>AGGCTGCACGCCC | 83 | 86 | NPR1   | 353376;253<br>376 |
| 54 | AF395335.1         | 1455-1555 | CTGCTGACGAAGAAGAAAGTATATTTTAGTGTGAGATGTCAGCC<br>TCCAGGAAGGCAAGGGCTCCGAAGATTTGGCAACGTGGCTTAAT<br>CGTTCCGCTTTT | 81 | 80 | NRP1   | 353419;253<br>419 |

|    |                    |           |                                                                                                               |    |    |       |                   |
|----|--------------------|-----------|---------------------------------------------------------------------------------------------------------------|----|----|-------|-------------------|
| 55 | EU366494.<br>1     | 70-170    | ATTTTCCTAGCTCTCTACTTTTCAGGACATGAAGTGAGAGGCCAA<br>GCAGACCAACCCTGTGGAGGTCGTTTGAATTCAAAGACGCTGG<br>CTACATCACCT   | 81 | 85 | NRP2  | 353436;253<br>436 |
| 56 | EE840398.<br>1     | 202-302   | AAGTGCCAGCCGTCGCGCGTCCACCACCGGAACGTCAAGGTGG<br>CCAAGGTGGAGTACTTCAGGAAGAAGGCCGAAGTTGAAAGAGGT<br>GCAGGTGCGGCTGG | 86 | 85 | PDGFA | 353395;253<br>395 |
| 57 | EE771049.<br>1     | 339-439   | GAGGAAAATTTGCCTGGACCAGCAGAATCCTCTGTATAAGAAAA<br>TAATCAAGAGGCTTTTGAAGAATTAGCTGCCTAAATCCCTACTGT<br>TGCTATAGAAA  | 81 | 79 | PF4   | 353393;253<br>393 |
| 58 | AY157708.<br>1     | 172-272   | GACAGCCAACGTCACCATGCAGCTCATGAAGTACCACTCTCTGG<br>ACCAGCCCTTCTTTGTGGAGATGAGCTTCTCTCAGCACGTCCGC<br>TGCGAGTGCGAA  | 85 | 83 | PGF   | 353389;253<br>389 |
| 59 | NM_001163<br>593.1 | 1635-1735 | GATCAGGATGGAAGGGTGGTCCTGAACCGGGATGGTATTGTCC<br>ATTTCTGGACTAAAGCTTCCTGGAGTTAAAAATGGCATCTCCTGT<br>GCATAGGTGGAA  | 84 | 83 | PLAU  | 353460;253<br>460 |
| 60 | EE768764.<br>1     | 140-240   | AGAGGATTGCGCAGCAAAGTGTGAGGAGGAGAAAGACTTCGTTT<br>GCAAGGCATTCCAGTATCACGGTAAAGAGCAACAATGTGTCATA<br>ATGGGCGAAAGC  | 85 | 82 | PLG   | 353431;253<br>431 |

|    |                    |           |                                                                                                              |    |    |              |                   |
|----|--------------------|-----------|--------------------------------------------------------------------------------------------------------------|----|----|--------------|-------------------|
| 61 | GO745129.<br>1     | 220-320   | TGCTCGCCCGACAGCTCCTTCATCCCCTTTGACGGATACTTCAC<br>CACCACCTCCTCCTCCCTCTTGATTGACAGCCTCACCACGGAAT<br>ACGACACCAATG | 85 | 86 | PLXDC1       | 353438;253<br>438 |
| 62 | NM_001009<br>476.1 | 1535-1635 | TGCTTTGGAATTCTACCCGGGGCTACTTCTTGAGAAGTGCCATC<br>CGAACTCCATCTTTGGGGAGAGTATGATAGAAATGGGGGCTCCT<br>TTTTCCCTTAAG | 84 | 79 | PTGS1        | 353451;253<br>451 |
| 63 | EE794035.<br>1     | 350-450   | ACCACCCTATGACAAGAAAAAGCGAATGGTGGTTCCTGCTGCCC<br>TCAAGTTGTGCGTCTGAAGCCTACTCGCAAGTTTGCCTACCTA<br>GGGCGCCTGGCT  | 86 | 86 | RPL13A       | 353433;253<br>433 |
| 64 | CD288584.<br>1     | 84-184    | TCTCGGAGCTCGCTTGTATCTACTCTGCCCTCATTCTGCACGAC<br>GATGAGGTGACGGTCACGGAGGATAAGATCAATGCCCTCATTAA<br>AGCAGCCGGTGT | 84 | 86 | RPLP1        | 353380;253<br>380 |
| 65 | GT879142.<br>1     | 655-755   | AGAGAACATCTTTGTTTTGCTGACCATCTGGAAAACCAAGAAGTT<br>CCACCGACCCATGTACTATTTTATCGGCAACCTGGCCCTCTCAG<br>ACCTGTTGGCG | 80 | 84 | S1PR1        | 353442;253<br>442 |
| 66 | EE839061.<br>1     | 216-316   | ATTCTGGGCCTTCCGTATCGAAACCATGACCTCAGCATGTTCTT<br>GCTGCTGCCCAATGACATCGACGGTCTGGAGAAGATTATAGATA<br>AAATAACTCCTG | 82 | 82 | SERPINB<br>5 | 353379;253<br>379 |

|    |                    |         |                                                                                                              |    |    |              |                   |
|----|--------------------|---------|--------------------------------------------------------------------------------------------------------------|----|----|--------------|-------------------|
| 67 | NM_001139<br>447.1 | 810-910 | AACTGCAAGATCGCCCAGCTGCCCTTGACCGGGAGCACAAGTAT<br>CATCTTCTTCCTGCCTCAGAAAGTGACCCAGAACTTGACCTTGAT<br>AGAAGAGAGCC | 86 | 85 | SERPINF<br>1 | 353458;253<br>458 |
| 68 | DY504212.<br>1     | 375-475 | GCCATCCAGAAGCCCCTGTGTAGCCTCCCGGCCGGCTCTGGCA<br>ATGCGATGGCCGCTTCTTTGAACTATTACGCCGGGTATGAGCAG<br>GTGACTAAGGAAG | 86 | 85 | SPHK1        | 353391;253<br>391 |
| 69 | GO762530.<br>1     | 291-391 | CTGAGCTACGCCAATGCCACCCCGAGGGTCTCGAGTTTCTGG<br>ACTTCCTGGACGACGAGCGCACCTACAAGACGCTCTTCGTCCCT<br>GTCAATGAAGGTT  | 86 | 86 | STAB1        | 353415;253<br>415 |
| 70 | AY881030.<br>1     | 255-355 | TCACCTCAGCCTTCACCAGGCTCATAGTCCGGAGATGTGAAGCT<br>CAGAAGTGGGGACCTGAATGTAACCGCATCTGCACTGCTTGTAT<br>GAACAATGGGAT | 86 | 85 | TEK          | 353425;253<br>425 |
| 71 | L36232.1           | 176-276 | CAGGTTTTTGTTCAGGAGGAGAAGCCAGCGTGTGTCTGCCACT<br>CTGGGTACGTCGGTGCACGCTGTGAACACGCAGACCTCCTGGC<br>CGTGGTGGCTGCC  | 85 | 86 | TGFA         | 353397;253<br>397 |
| 72 | NM_001009<br>400.1 | 635-735 | GGAAATAGAAGGCTTTTCGCCTCAGTGCCCACTGTTCTGTGACA<br>GTAAGGATAACACGCTTCAAGTGGACATCAACGGGTTCAAGTCC<br>GGCCGCCGGGGT | 85 | 85 | TGFB1        | 353449;253<br>449 |

|    |                    |         |                                                                                                              |    |    |        |                   |
|----|--------------------|---------|--------------------------------------------------------------------------------------------------------------|----|----|--------|-------------------|
| 73 | AY656797.<br>1     | 880-980 | AGCGTGCTCTGGACGCAGCCTATTGCTTTAGAAATGTGCAGGAT<br>AATTGTTGCCTACGCCCACTTTACATTGATTTCAAGAGGGATCTT<br>GGGTGGAAATG | 82 | 81 | TGFB2  | 353420;253<br>420 |
| 74 | AY656798.<br>1     | 570-670 | ACGTCACAGACACTGTGCGTGAATGGCTCTCGCGGAGAGAATC<br>CAACTTAGGTCTGCAAATCAGCATCCACTGTCCCTGTCACACCT<br>TTCAGCCCAATGG | 85 | 86 | TGFB3  | 353421;253<br>421 |
| 75 | AY656799.<br>1     | 70-170  | ACGAGACAGGCCATTTGTATGTGCACCATCTTCAAAAAGTGGGT<br>CTACAACATATTGCTGCAACCAGGACCACTGCAATAAAATAGAAC<br>TTCCAAGTGC  | 82 | 83 | TGFBR1 | 353422;253<br>422 |
| 76 | GO725318.<br>1     | 96-196  | ACTCAGGGCAGGAAGACTATGACAAGGATGGAATCGGCGATGC<br>CTGTGATGATGACGATGACCATGATAAAATTCCAGATGACAGGG<br>ACAAGTGTCCATT | 86 | 83 | THBS1  | 353405;253<br>405 |
| 77 | DY521350.<br>1     | 385-485 | ACAACCCCGACCAGACCGACGTGGACAATGACCTCGTGGGAGA<br>CCAGTGTGACGACAATGAGGACATCGATGAAGATGGCCACCAGA<br>ACAACCAGGACAA | 86 | 85 | THBS2  | 353392;253<br>392 |
| 78 | NM_001009<br>319.2 | 345-445 | ACTAAGATGTTCAAAGGGTTCAGTGCCTTGAGAGATGCCCCAGA<br>CATCCGATTCATCTACACCCCTGCCATGGAGAGCGTCTGCGGAT<br>ACTTCCACAGGT | 85 | 85 | TIMP1  | 353447;253<br>447 |

|    |                    |           |                                                                                                              |    |    |         |                   |
|----|--------------------|-----------|--------------------------------------------------------------------------------------------------------------|----|----|---------|-------------------|
| 79 | NM_001166<br>186.1 | 174-274   | AACGACATCTATGGCAACCCCATCAAGCGGATTCAGTATGAGAT<br>CAAGCAGATAAAGATGTTCAAGGGACCTGACCAGGACATAGAGT<br>TTATCTACACAG | 84 | 82 | TIMP2   | 353408;253<br>408 |
| 80 | NM_001166<br>187.1 | 250-350   | CGGAAGCCTCTGAAAGTCTCTGTGGCCTTAAGCTTGAGGTCAAC<br>AAGTACCAGTACCTGCTGACAGGCCGTGTCTATGATGGCAAGAT<br>GTACACAGGACT | 86 | 86 | TIMP3   | 353463;253<br>463 |
| 81 | NM_001024<br>860.1 | 1230-1330 | CTTCAACTCTCCCTTCCTGCCAGTGTTTCCAGATTCCCCTGAGG<br>TGGGAAGCCCAGCCCCAACCCCACTGGGCCAACTCCCTCTGTTT<br>ATGTTTGCACTT | 83 | 86 | TNF     | 353455;253<br>455 |
| 82 | GT643835.<br>1     | 729-829   | GCCCTGAAGGAGGGGTCAGGAGGGGTGTGTGGCTCGGGGACC<br>CAGCTCTGGGATCACCGCCTGTTACGAGATCCTGCCCCACCT<br>GCCTGAGGACCGCCC  | 92 | 91 | TNFAIP2 | 353384;253<br>384 |
| 83 | NM_001025<br>110.1 | 115-215   | TGATGAAGTTCATGGATGTCTACCAGCGCAGCTTCTGCCGTCCC<br>ATTGAGACCCTGGTGGACATCTTCCAGGAGTACCCAGATGAGAT<br>TGAGTTCATTTT | 83 | 81 | VEGFA   | 353456;253<br>456 |
| 84 | EE814744.<br>1     | 41-141    | GCTCCCGTCTCCAGCCTGATGCCCTGGTCACCAGAAGAAAGT<br>GGTGTCATGGATAGACGTGTATGCTCGTGCCACCTGCCAGCCG<br>CGGGAGGTGGTGG   | 85 | 85 | VEGFB   | 353394;253<br>394 |

|    |                    |           |                                                                                                               |    |    |       |                   |
|----|--------------------|-----------|---------------------------------------------------------------------------------------------------------------|----|----|-------|-------------------|
| 85 | DY521036.<br>1     | 32-132    | AAAAGTCAGTTTCCTGAACCACGTGGAGAATGTTACAGAAATGG<br>ACTGGAGCTCATCTGCAAAGACCTCTTTAAAAGACTGGTTTTCT<br>GCCAATGACCA   | 82 | 79 | VEGFC | 353381;253<br>381 |
| 86 | NM_001009<br>784.1 | 1200-1300 | GCAAATGCTTCTAGGCGGACTGTTAGCTGCGTTACACCCTTTTT<br>CTTGACAAAACCTAACTTGCGCAGAAAACGAGATGAGATTGGCC<br>TCGTGCGATTCCG | 79 | 83 | ACTB  | 353453;253<br>453 |
| 87 | NM_001009<br>284.1 | 285-385   | CAACAGCAAGGATCAGTACAGCTGCCGAGTGAATCACGTTACTC<br>TAACACAACCCAAGATAGTTAAGTGGGATCGAGACCTCTAAGCA<br>GCACCATCAAGA  | 85 | 85 | B2M   | 353446;253<br>446 |
| 88 | NM_001190<br>390.1 | 1088-1188 | TTCCTCAGCTGCTGGGGAGTCCTGCCCCACCTCCACCACACTGA<br>GAATCTCCCGACCTCCATACATTTCCATCCTCAAGGCCCTGAGG<br>AAAGGGAGGGGC  | 89 | 88 | GAPDH | 353382;253<br>382 |
| 89 | EE824765.<br>1     | 698-798   | AGATGAGAGTTCGAGTTGAGTTTGGAAATACCTGGCATCCCATT<br>GAAATCACCAGTGACATGATCCCATGTTCTCATTCTGTGGCCAG<br>CTGCTTAGTAGA  | 79 | 82 | HPRT1 | 353378;253<br>378 |
| 90 | EE751721.<br>1     | 175-275   | TGATGGATCTCCAACATGGCAGCCTTTTCCTTAGAACACCAAAAA<br>TTGTCTCTGGCAAAGACTATAATGTAACAGCAAACCTCCAGGCTG<br>GTTATCATCAC | 79 | 84 | LDHA  | 353430;253<br>430 |
